# Supplementary material
Source: Springer Nature journal article supplement (https://www.springermedizin.de/resource/supplementary/12874_2012_897_MOESM3_ESM.pdf/9433182)

Density Plots of Sigma.e for All Models

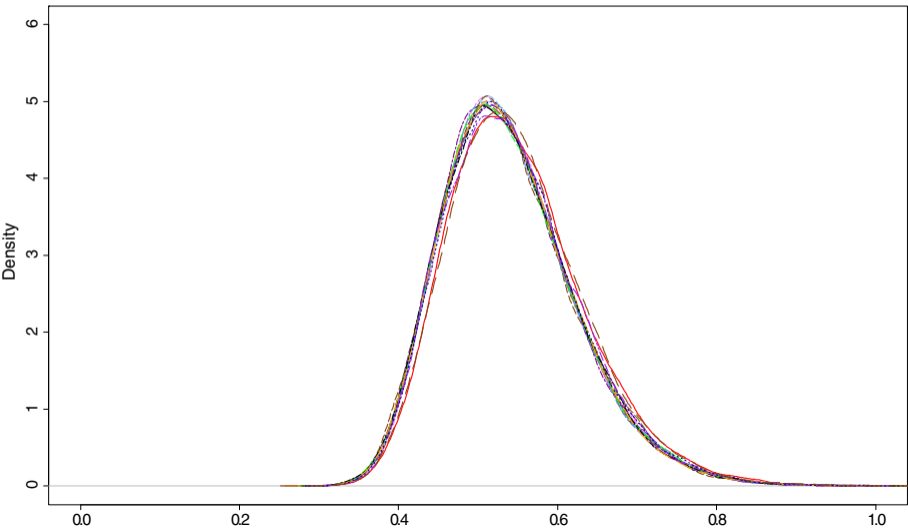

Supplement: MOESM3 [file 9433182]
